# Supplementary material for: g-C3N4/CoNiFe-LDH Z-scheme heterojunction for efficient CO2 photoreduction and MB dye photodegradation
Source: Royal Society of Chemistry journal article supplement (doi:10.1039/d1cy01475g), 2021-01-01
Supplement: d1cy01475g1.pdf [file d1cy01475g1.pdf]

# **g-C<sub>3</sub>N<sub>4</sub>/CoNiFe-LDH Z-Scheme Heterojunction for efficient CO<sub>2</sub> photoreduction and MB dye photodegradation**

*Biao Zhu<sup>‡</sup>, Qianxin Xu<sup>‡</sup>, Xiaoyan Bao, Dawei Lu, Hao Yin, Yumei Qin\* and Xing-Can Shen\**

\* E-mail: [qinyumei@gxnu.edu.cn](mailto:qinyumei@gxnu.edu.cn)

State Key Laboratory for Chemistry and Molecular Engineering of Medicinal Resources,  
School of Chemistry and Pharmaceutical Science, Guangxi Normal University, Guilin,  
541004, PR China.

<sup>‡</sup> These authors contributed equally to this work.

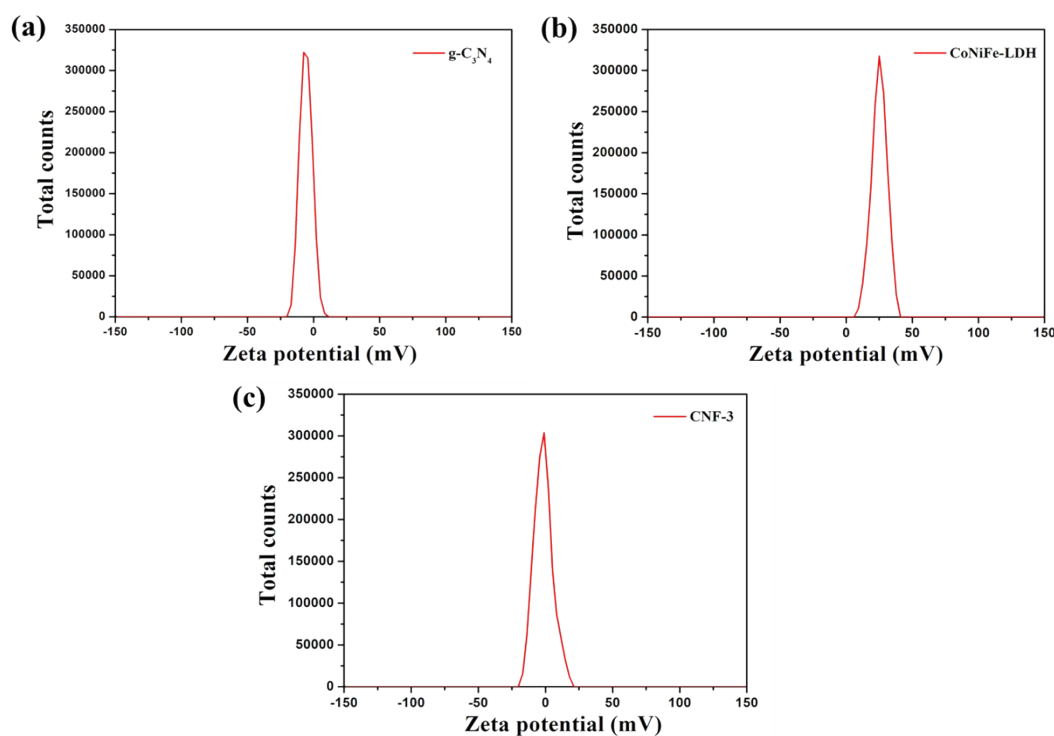

**Fig. S1** Zeta potentials of (a) g-C<sub>3</sub>N<sub>4</sub>, (b) CoNiFe-LDH, (c) CNF-3 samples dispersed in water.

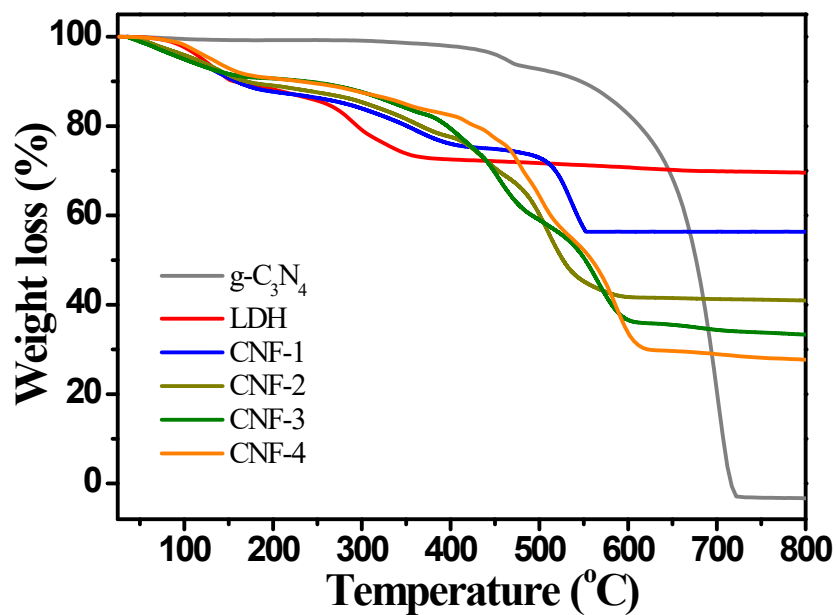

Fig. S2 TGA curves of the synthesized samples.

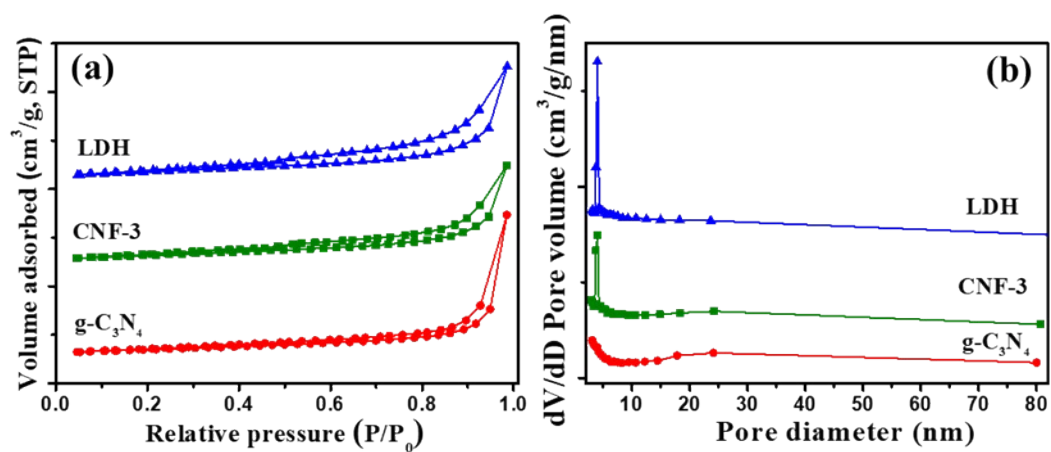

Fig. S3 (a) N<sub>2</sub> adsorption/desorption isotherms and (b) the corresponding pore size distribution of different samples.

**Table S1.** Comparative performance of inorganic heterostructures for the photocatalytic reduction of CO<sub>2</sub>

| Material                                                        | Reaction conditions                         | Light source               | Product                | CO Yied/<br>μmol g <sup>-1</sup> h <sup>-1</sup> | Ref.      |
|-----------------------------------------------------------------|---------------------------------------------|----------------------------|------------------------|--------------------------------------------------|-----------|
| <b>CoNiFe-LDH/g-C<sub>3</sub>N<sub>4</sub></b>                  | CO <sub>2</sub> and water vapor             | 300 W Xe                   | CO                     | 42.05                                            | This work |
| <b>CuS atomic layer</b>                                         | CO <sub>2</sub> and water vapor             | IR light                   | CO                     | 14.5                                             | 1         |
| <b>Cu/C<sub>3</sub>N<sub>4</sub>-6</b>                          | CO <sub>2</sub> and 0.1 M KHCO <sub>3</sub> | 350W Xe lamp               | CO                     | 9.9                                              | 2         |
| <b>P/Bi-BOB-0.25</b>                                            | CO <sub>2</sub> and water vapor             | 300 W Xe lamp              | CO                     | 3.14                                             | 3         |
| <b>BON-Br</b>                                                   | CO <sub>2</sub> and water vapor             | 300 W Xe lamp              | CO                     | 8.12                                             | 4         |
| <b>CoZnAl-LDH/rGO/g-C<sub>3</sub>N<sub>4</sub></b>              | CO <sub>2</sub> and water vapor             | 300 W Xe lamp              | CO                     | 10.11                                            | 5         |
| <b>Ti<sub>3</sub>C<sub>2</sub>/g-C<sub>3</sub>N<sub>4</sub></b> | CO <sub>2</sub> and water vapor             | 300 W Xe lamp (λ≥420nm)    | CO                     | 2.24                                             | 6         |
| <b>NG/CdS</b>                                                   | CO <sub>2</sub> and water vapor             | 300 W Xe lamp (λ≥420nm)    | CO                     | 2.59                                             | 7         |
| <b>CdS/CdWO<sub>4</sub></b>                                     | CO <sub>2</sub> and water vapor             | 300 W Xe lamp              | CO                     | 1.39                                             | 8         |
| <b>CN-PA12</b>                                                  | CO <sub>2</sub> and water vapor             | (100 mW•cm <sup>-2</sup> ) | CO and CH <sub>4</sub> | 5.42                                             | 9         |
| <b>K-CN-7</b>                                                   | CO <sub>2</sub> and water vapor             | Visible-light (λ>420 nm)   | CO                     | 8.7                                              | 10        |
| <b>Pt@45CeO<sub>2</sub>/3DCN</b>                                | CO <sub>2</sub> and 0.1 M NaOH              | UV light                   | CO and CH <sub>4</sub> | 4.69                                             | 11        |
| <b>Cu<sub>2</sub>O-loaded Zn-Cr-LDH</b>                         | CO <sub>2</sub> and water vapor             | 200W Hg-Xe                 | CO                     | 1.3                                              | 12        |

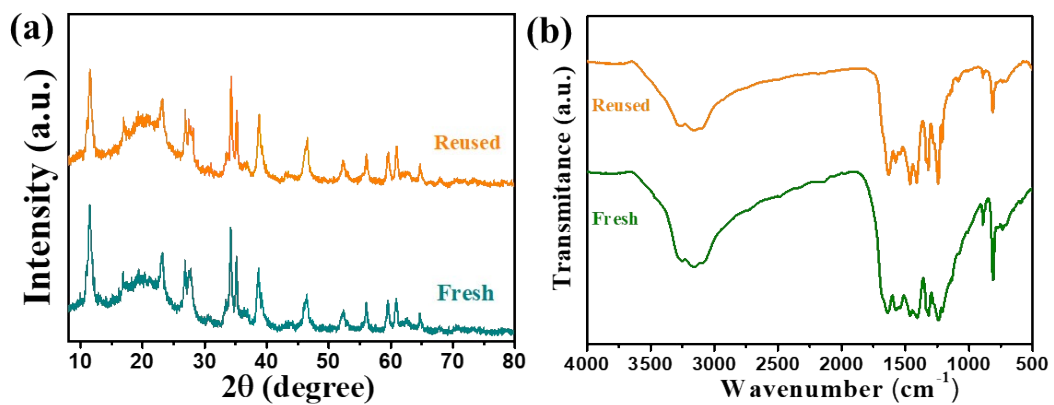

**Fig. S4** (a) XRD patterns and (b) FT-IR of CNF-3 photocatalyst before and after photocatalytic reactions.

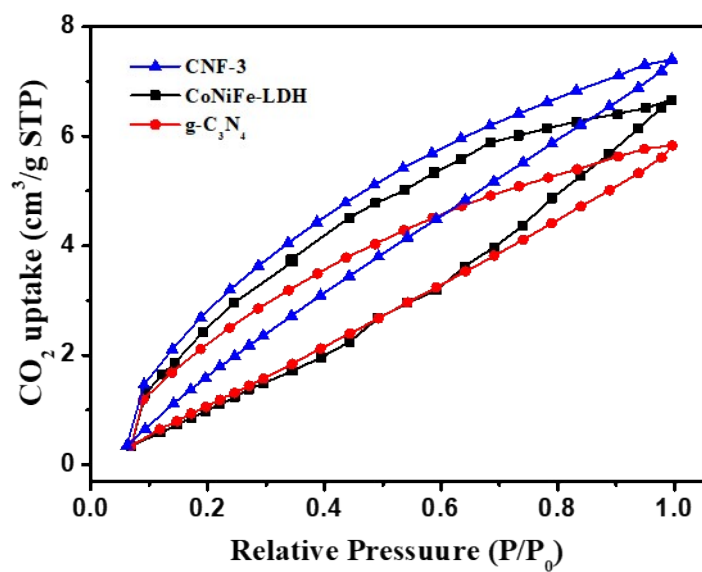

**Fig. S5** CO<sub>2</sub> adsorption-desorption isotherms of the CNF-3, pure C<sub>3</sub>N<sub>4</sub> and LDH.

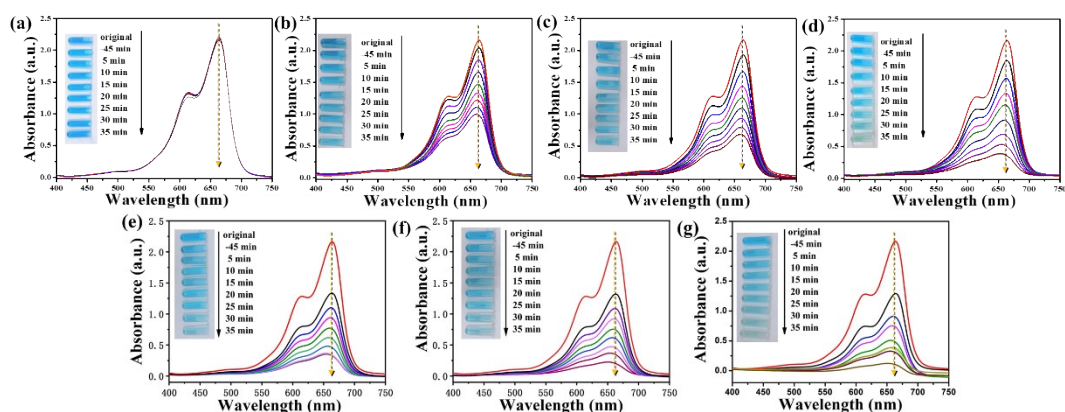

**Fig. S6** The time-dependent UV-vis absorption spectra of MB with the use of different samples: (a) no catalyst; (b)  $\text{H}_2\text{O}_2$ ; (c)  $\text{H}_2\text{O}_2$ +LDH; (d)  $\text{H}_2\text{O}_2$ +g- $\text{C}_3\text{N}_4$ ; (e)  $\text{H}_2\text{O}_2$ +CNF-1; (f)  $\text{H}_2\text{O}_2$ +CNF-2; (g)  $\text{H}_2\text{O}_2$ +CNF-4.

## Reference

- Li, X.; Liang, L.; Sun, Y.; Xu, J.; Jiao, X.; Xu, X.; Ju, H.; Pan, Y.; Zhu, J.; Xie, Y., Ultrathin Conductor Enabling Efficient IR Light  $\text{CO}_2$  Reduction. *J. Am. Chem. Soc.* **2019**, *141* (1), 423-430.
- Shi, G.; Yang, L.; Liu, Z.; Chen, X.; Zhou, J.; Yu, Y., Photocatalytic reduction of  $\text{CO}_2$  to CO over copper decorated g- $\text{C}_3\text{N}_4$  nanosheets with enhanced yield and selectivity. *Appl. Surf. Sci.* **2018**, *427*, 1165-1173.
- Zhu, J.-y.; Li, Y.-p.; Wang, X.-j.; Zhao, J.; Wu, Y.-s.; Li, F.-t., Simultaneous Phosphorylation and Bi Modification of BiOBr for Promoting Photocatalytic  $\text{CO}_2$  Reduction. *ACS Sustainable Chem. Eng.* **2019**, *7* (17), 14953-14961.
- Hao, L.; Kang, L.; Huang, H.; Ye, L.; Han, K.; Yang, S.; Yu, H.; Batmunkh, M.; Zhang, Y.; Ma, T., Surface-Halogenation-Induced Atomic-Site Activation and Local Charge Separation for Superb  $\text{CO}_2$  Photoreduction. *Adv. Mater.* **2019**, *31* (25), 1900546.
- Yang, Y.; Wu, J.; Xiao, T.; Tang, Z.; Shen, J.; Li, H.; Zhou, Y.; Zou, Z., Urchin-like hierarchical CoZnAl-LDH/RGO/g- $\text{C}_3\text{N}_4$  hybrid as a Z-scheme photocatalyst for efficient and selective  $\text{CO}_2$  reduction. *Appl. Catal. B Environ.* **2019**, *255*, 117771.
- Tang, Q.; Sun, Z.; Deng, S.; Wang, H.; Wu, Z., Decorating g- $\text{C}_3\text{N}_4$  with alkalized Ti $3\text{C}_2$  MXene for promoted photocatalytic  $\text{CO}_2$  reduction performance. *J. Colloid Interface Sci.* **2020**, *564*, 406-417.
- Bie, C.; Zhu, B.; Xu, F.; Zhang, L.; Yu, J., In Situ Grown Monolayer N-Doped Graphene on CdS Hollow Spheres with Seamless Contact for Photocatalytic  $\text{CO}_2$  Reduction. *Adv. Mater.* **2019**, *31* (42), 1902868.
- Li, Y.-Y.; Wei, Z.-H.; Fan, J.-B.; Li, Z.-J.; Yao, H.-C., Photocatalytic  $\text{CO}_2$  reduction activity of Z-scheme CdS/CdWO $_4$  catalysts constructed by surface charge directed selective deposition of CdS. *Appl. Surf. Sci.* **2019**, *483*, 442-452.

9. Wang, Z.; Lee, H.; Chen, J.; Wu, M.; Leung, D. Y. C.; Grimes, C. A.; Lu, Z.; Xu, Z.; Feng, S.-P., Synergistic effects of Pd–Ag bimetals and g-C<sub>3</sub>N<sub>4</sub> photocatalysts for selective and efficient conversion of gaseous CO<sub>2</sub>. *J. Power Sources* **2020**, *466*, 228306.
10. Wang, S.; Zhan, J.; Chen, K.; Ali, A.; Zeng, L.; Zhao, H.; Hu, W.; Zhu, L.; Xu, X., Potassium-Doped g-C<sub>3</sub>N<sub>4</sub> Achieving Efficient Visible-Light-Driven CO<sub>2</sub> Reduction. *ACS Sustainable Chem. Eng.* **2020**, *8* (22), 8214-8222.
11. Zhao, X.; Guan, J.; Li, J.; Li, X.; Wang, H.; Huo, P.; Yan, Y., CeO<sub>2</sub>/3D g-C<sub>3</sub>N<sub>4</sub> heterojunction deposited with Pt cocatalyst for enhanced photocatalytic CO<sub>2</sub> reduction. *Appl. Surf. Sci.* **2021**, *537*, 147891.
12. Jiang, H.; Katsumata, K.-i.; Hong, J.; Yamaguchi, A.; Nakata, K.; Terashima, C.; Matsushita, N.; Miyauchi, M.; Fujishima, A., Photocatalytic reduction of CO<sub>2</sub> on Cu<sub>2</sub>O-loaded Zn-Cr layered double hydroxides. *Appl. Catal. B Environ.* **2018**, *224*, 783-790.
